# Supplementary material for: Effects of adatom and gas molecule adsorption on the physical properties of tellurene: a first principles investigation
Source: Royal Society of Chemistry journal article supplement (doi:10.1039/c7cp07906k), 2018-01-01
Supplement: c7cp07906k1.pdf [file c7cp07906k1.pdf]

## Electronic Supplementary Information

### **Effects of adatom and gas molecule adsorption on physical properties of tellurene: a first principles investigation**

*Xiao Hua Wang<sup>a</sup>, Da Wei Wang<sup>a</sup>, Ai Jun Yang<sup>\*a</sup>, Nikhil Koratkar<sup>\*b</sup>, Ji Feng Chu<sup>a</sup>, Pin Lei Lv<sup>a</sup>,  
and Ming Zhe Rong<sup>a</sup>*

- a. State Key Laboratory of Electrical Insulation and Power Equipment, Xi'an Jiaotong University, No 28 Xianning West Road, Xi'an, Shaanxi Province 710049, China. E-mail: yangaijun@mail.xjtu.edu.cn
- b. Department of Materials Science and Engineering, Rensselaer Polytechnic Institute, 110 8th Street, Troy, NY 12180, USA. E-mail: [koratn@rpi.edu](mailto:koratn@rpi.edu)

S1. Top and side views of optimized adatoms adsorption structures ( $\alpha$ , and  $\beta$  tellurene phases).

S2. PDOSs of  $\alpha$ , and  $\beta$  tellurene phases decorated adatoms.

S3. Cohesive energy and adsorption energy of metal adatoms.

***S1. Top and side views of optimized adatoms adsorption structures ( $\alpha$ , and  $\beta$  tellurene phases)***

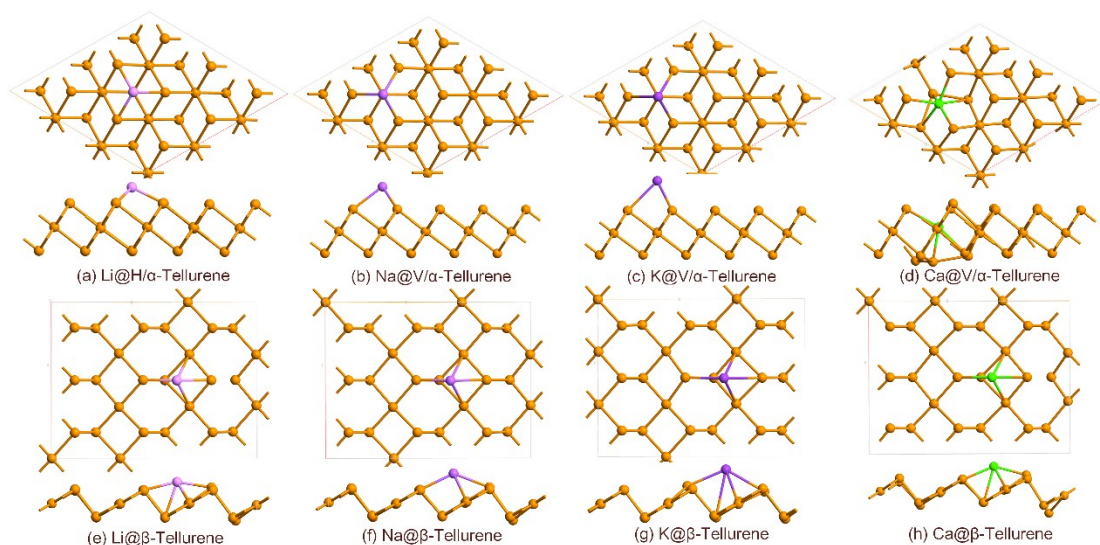

Figure S1. Top and side views of optimized alkali and alkaline-earth adatom (Li, Na, K, and Ca) adsorption structures ( $\alpha$ , and  $\beta$  tellurene phases). The Te atoms are shown by orange balls, and adatoms are shown by balls with other different colors.

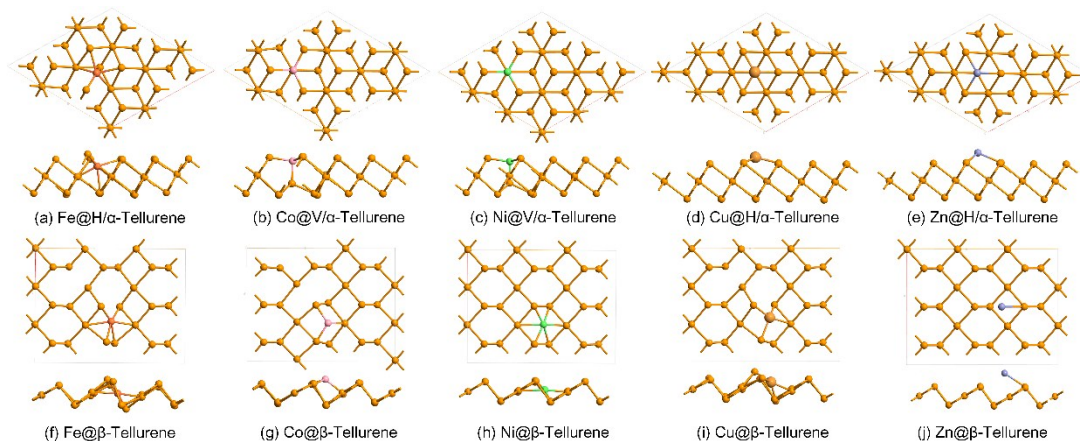

Figure. S1 Top and side views of optimized transition metal adatom (Fe, Co, Ni, Cu, and Zn) adsorption structures ( $\alpha$ , and  $\beta$  tellurene phases). The Te atoms are shown by orange balls, and adatoms are shown by balls with other different colors.

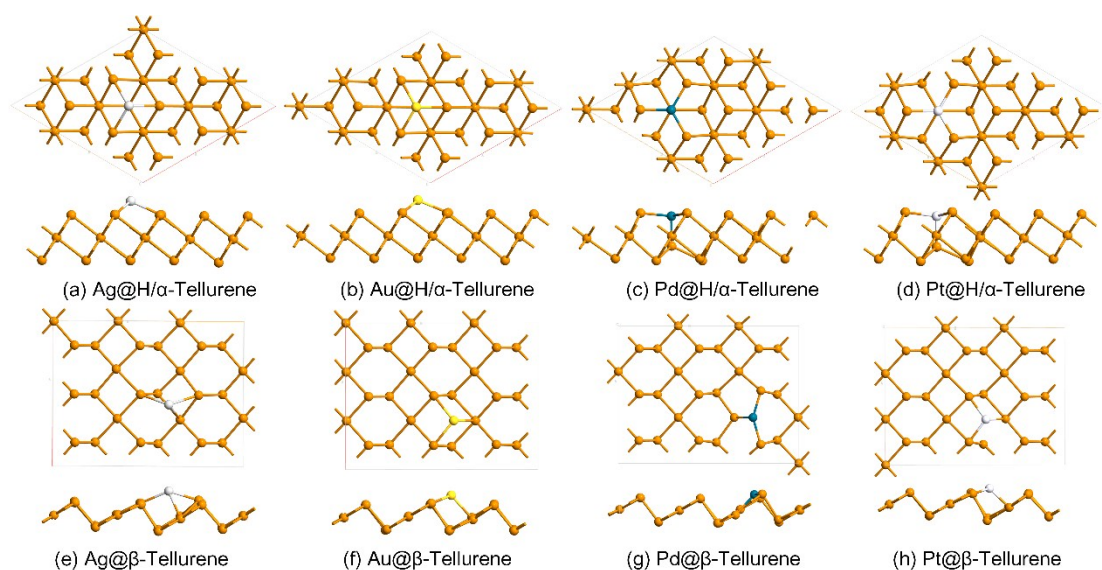

Figure. S1 Top and side views of optimized noble metal adatom (Ag, Au, Pd, and Pt) adsorption structures ( $\alpha$ , and  $\beta$  tellurene phases). The Te atoms are shown by orange balls, and adatoms are shown by balls with other different colors.

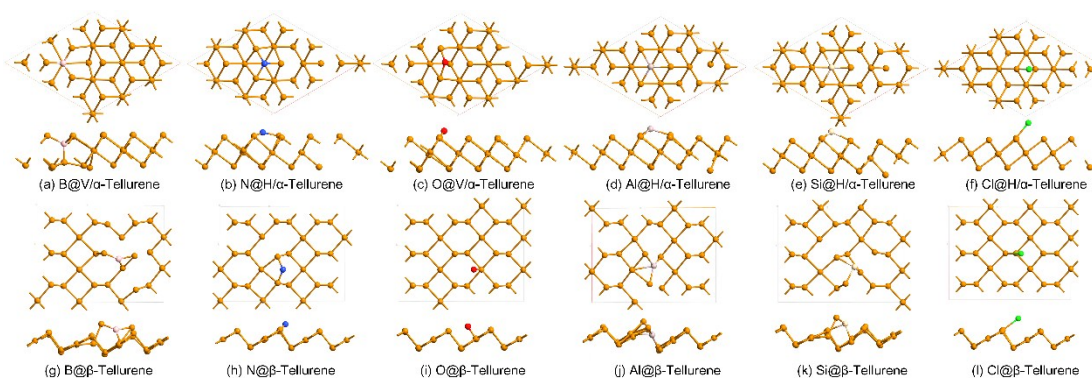

Figure. S1 Top and side views of optimized nonmetallic adatom (B, N, O, Si, and Cl), and Al adatom adsorption structures ( $\alpha$ , and  $\beta$  tellurene phases). The Te atoms are shown by orange balls, and adatoms are shown by balls with other different colors.

## S2. PDOSs of $\alpha$ , and $\beta$ tellurene phases decorated adatoms

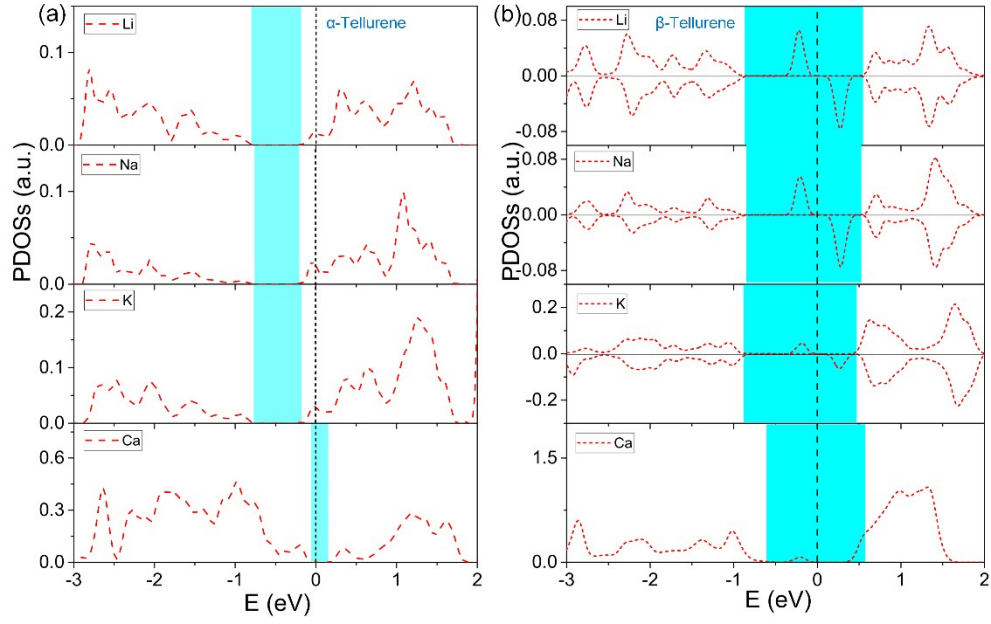

Figure. S2 PDOSs of  $\alpha$ , and  $\beta$  tellurene phases decorated with alkali and alkali-earth adatoms (Li, Na, K, and Ca). The vertical dotted lines denote the Fermi level and the light blue rectangles denote the band gap.

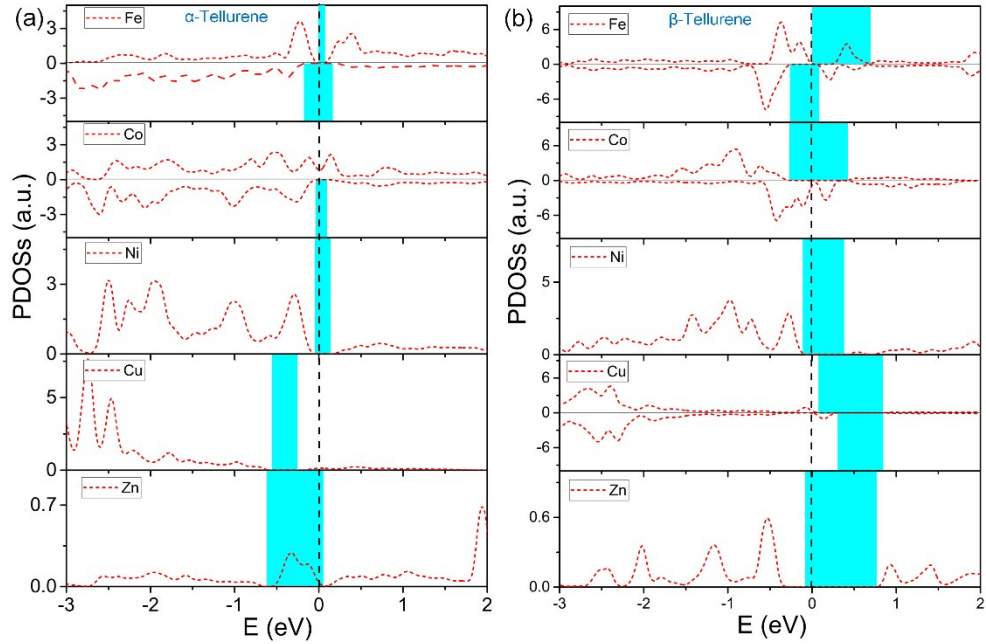

Figure. S2 DOSs of  $\alpha$ , and  $\beta$  tellurene phases decorated with transition metal adatoms (Fe, Co, Ni, Cu, and Zn). The vertical dotted lines denote the Fermi level and the light blue rectangles denote the band gap.

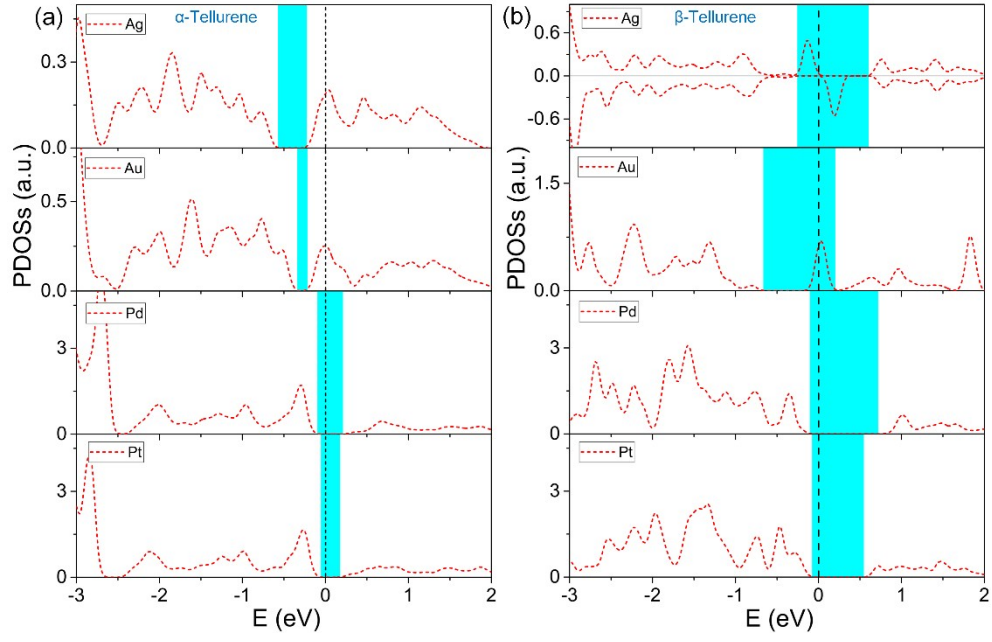

Figure. S2 PDOSs of  $\alpha$ , and  $\beta$  tellurene phases decorated with noble metal adatoms (Ag, Au, Pd, and Pt). The vertical dotted lines denote the Fermi level and the light blue rectangles denote the band gap.

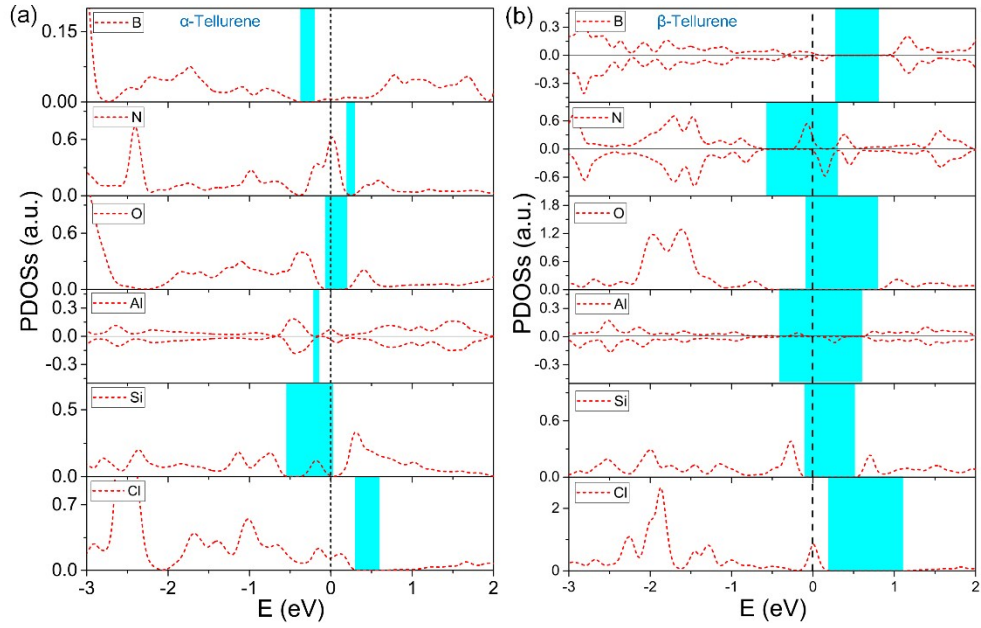

Figure. S2 PDOSs of  $\alpha$ , and  $\beta$  tellurene phases decorated with nonmetallic adatoms (B, N, O, Si, Cl) and Al adatom. The vertical dotted lines denote the Fermi level and the light blue rectangles denote the band gap.

***S3. Cohesive energy and adsorption energy of metal adatoms***

| <b>Element</b> | <b>Cohesive energy (DFT work)</b> | <b>Cohesive energy (exp<sup>1</sup>)</b> | <b>Adsorption energy (<math>\alpha</math>-Te)</b> | <b>Adsorption energy (<math>\alpha</math>-Te)</b> | <b>Agglomerat ion (<math>\alpha</math>-Te)</b> | <b>Agglomera tion (<math>\beta</math>-Te)</b> |
|----------------|-----------------------------------|------------------------------------------|---------------------------------------------------|---------------------------------------------------|------------------------------------------------|-----------------------------------------------|
| Li             | 1.55                              | 1.63                                     | -2.238                                            | -2.346                                            | no                                             | no                                            |
| Na             | 1.06                              | 1.113                                    | -1.755                                            | -1.823                                            | no                                             | no                                            |
| K              | 0.84                              | 0.934                                    | -1.922                                            | -2.031                                            | no                                             | no                                            |
| Ca             | 1.73                              | 1.84                                     | -3.901                                            | -2.86                                             | no                                             | no                                            |
| Fe             | 4.93                              | 4.28                                     | -4.618                                            | -3.842                                            | yes                                            | yes                                           |
| Co             | 5.06                              | 4.39                                     | -4.931                                            | -2.828                                            | yes                                            | yes                                           |
| Ni             | 4.83                              | 4.44                                     | -3.1                                              | -4.67                                             | yes                                            | yes                                           |
| Cu             | 3.27                              | 3.49                                     | -2.757                                            | -2.74                                             | yes                                            | yes                                           |
| Zn             | 1.23                              | 1.35                                     | -0.569                                            | -0.364                                            | yes                                            | yes                                           |
| Ag             | 2.54                              | 2.95                                     | -1.976                                            | -1.334                                            | yes                                            | yes                                           |
| Au             | 3.02                              | 3.81                                     | -2.534                                            | -1.68                                             | yes                                            | yes                                           |
| Pd             | 3.72                              | 3.89                                     | -3.878                                            | -3.289                                            | no                                             | yes                                           |
| Pt             | 5.44                              | 5.84                                     | -5.544                                            | -4.199                                            | no                                             | yes                                           |
| Al             | 3.26                              | 3.39                                     | -2.754                                            | -3.42                                             | yes                                            | no                                            |

**References:**

1. C. Kittel, Introduction to Solid State Physics, 8th edn., Wiley, 2004.
